# Supplementary figures and images for: A survey of the anti-apoptotic Bcl-2 subfamily expression in cancer types provides a platform to predict the efficacy of Bcl-2 antagonists in cancer therapy
Source: PubMed Central journal article supplement — Cell Death Dis. 2010 May 6;1(5):e40–. doi: 10.1038/cddis.2010.18 (PMC3032312; doi:10.1038/cddis.2010.18), 2010-05-06

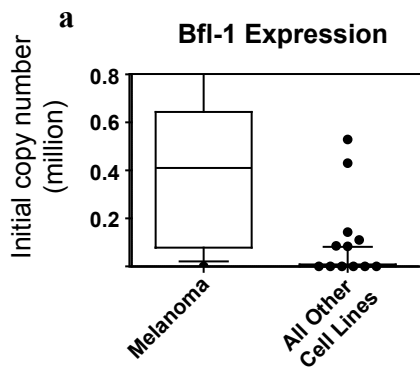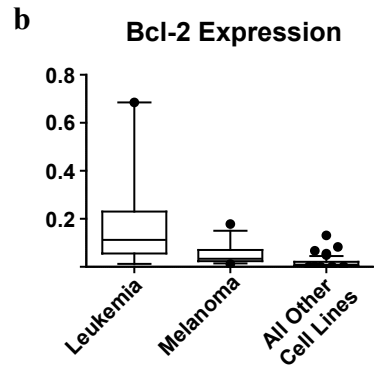

Supplementary Figure 1

Supplement: cddis201018x1.pdf [file cddis201018x1.pdf]

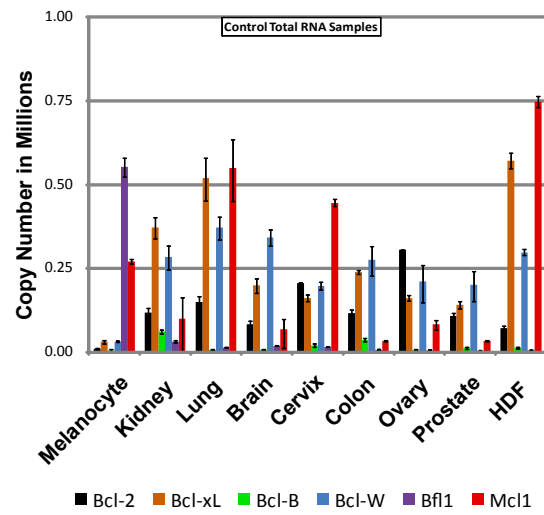

Supplementary Figure 2

Supplement: cddis201018x2.pdf [file cddis201018x2.pdf]
